# Supplementary material for: Predicting the structural, electronic and magnetic properties of few atomic-layer polar perovskite
Source: Royal Society of Chemistry journal article supplement (doi:10.1039/d0cp06671k), 2021-01-01
Supplement: d0cp06671k1.pdf [file d0cp06671k1.pdf]

## Predicting the Structural, Electronic and Magnetic Properties of Few Atomic-layer Polar Perovskite

Shaowen Xu<sup>a,b\*</sup>, Fanhao Jia<sup>a,b\*</sup>, Shunbo Hu<sup>b,a</sup>, Athinarayanan Sundaresan<sup>c</sup>, Nikita V.Ter-Oganessian<sup>d</sup> Alexander P. Pyatakov<sup>e</sup>, Jinrong Cheng<sup>b,a</sup>, Jincang Zhang<sup>b,a</sup>, Shixun Cao<sup>a,b</sup>, and Wei Ren<sup>a,b,†</sup>

<sup>a</sup>Physics Department, International Center for Quantum and Molecular Structures, Shanghai Key Laboratory of High Temperature Superconductors, Shanghai University, Shanghai 200444, China

<sup>b</sup>Materials Genome Institute, State Key Laboratory of Advanced Special Steel, School of Materials Science and Engineering, Shanghai University, Shanghai 200444, China

<sup>c</sup>Chemistry and Physics of Materials Unit, Jawaharlal Nehru Centre for Advanced Scientific Research, Bangalore-560064, India

<sup>d</sup>Institute of Physics, Southern Federal University, Rostov-on-Don, 344090, Russia

<sup>e</sup>M.V. Lomonosov Moscow State University, Faculty of Physics 1-2 Leninskiye Gory, GSP-1, Moscow, 119991, Russia

<sup>†</sup>[renwei@shu.edu.cn](mailto:renwei@shu.edu.cn)

\*These authors contributed equally to this work.

Table S1. The elastic constants (N/m) of few-AL KTaO systems. The criteria of elastic stability in 2D systems were described in Ref [1], where a stable structure should simultaneously satisfy  $C_{11} > 0$  &  $C_{66} > 0$  &  $C_{11} > |C_{12}|$  for 2AL and Type I 3AL (3AL<sub>I</sub>) cases, while the Type II 3AL (3AL<sub>II</sub>) system should meet  $C_{11} > 0$  &  $C_{66} > 0$  &  $C_{11}C_{22} > C_{12}^2$ .

| System            | Elastic Constants (N/m) |          |          |          |
|-------------------|-------------------------|----------|----------|----------|
|                   | $C_{11}$                | $C_{12}$ | $C_{66}$ | $C_{22}$ |
| 2AL               | 124.8                   | 35.3     | 6.4      | /        |
| 3AL <sub>I</sub>  | 135.0                   | 46.2     | 18       | /        |
| 3AL <sub>II</sub> | 168.7                   | 45.8     | 8.0      | 45.8     |

Table S2. The PBE optimized in-plane lattice parameter  $a$  (Å) which is defined by the distance between adjacent K atom. The energy gap (eV) was calculated by using the HSE06 method.

| System                | $a$ (Å) | Gap (eV)            |
|-----------------------|---------|---------------------|
| 2AL                   | 3.919   | 3.51                |
| 4AL                   | 3.941   | 3.21                |
| 6AL                   | 3.981   | 3.10                |
| 8AL                   | 3.990   | 2.75                |
| 10AL                  | 3.997   | 2.17                |
| Bulk <sub>cubic</sub> | 3.984   | 3.64 <sup>[2]</sup> |

Table S3. The PBE optimized in-plane lattice parameter  $a$  (Å) which is defined by the distance between adjacent K atom. The magnetic moment  $M$  ( $\mu_B/\text{u.c.}$ ) of odd-AL systems, where the “ $u.c.$ ” is defined by the in-plane area of EL unit-cell displayed in Fig. 1.

| System | $a$ (Å) |         | $M$ ( $\mu_B/\text{uc}$ ) |         |
|--------|---------|---------|---------------------------|---------|
|        | Type I  | Type II | Type I                    | Type II |
| 3AL    | 4.038   | 3.922   | 1                         | 0       |
| 5AL    | 4.039   | 3.989   | 0.93                      | 0.92    |
| 7AL    | 4.042   | 3.997   | 0.76                      | 0.75    |
| 9AL    | 4.043   | 4.004   | 0.48                      | 0.28    |

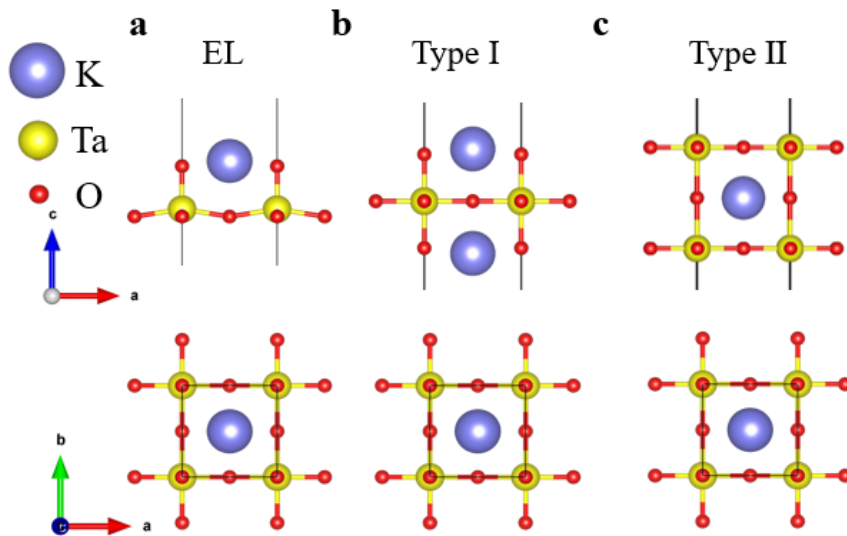

Figure S1. The side and top views of the ideal structures of 2D (a)  $\text{KTaO}_3$  (EL), (b)  $\text{K}_2\text{TaO}_4$  (Type I), and (c)  $\text{KTa}_2\text{O}_5$  (Type II).

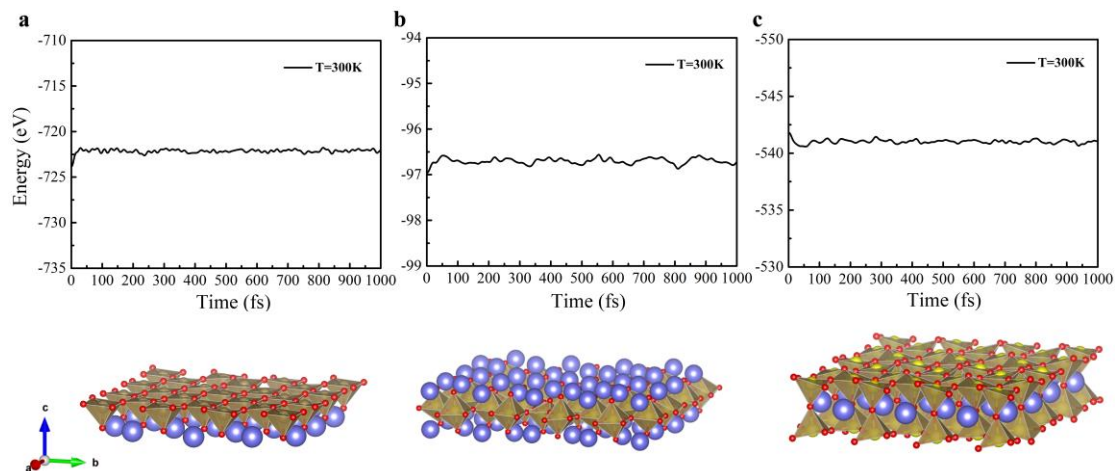

Figure S2. The *ab initio* molecular dynamics (AIMD) simulations were carried out for 1 ps with a time step of 1 fs at room temperature (300 K) within the canonical ensemble.

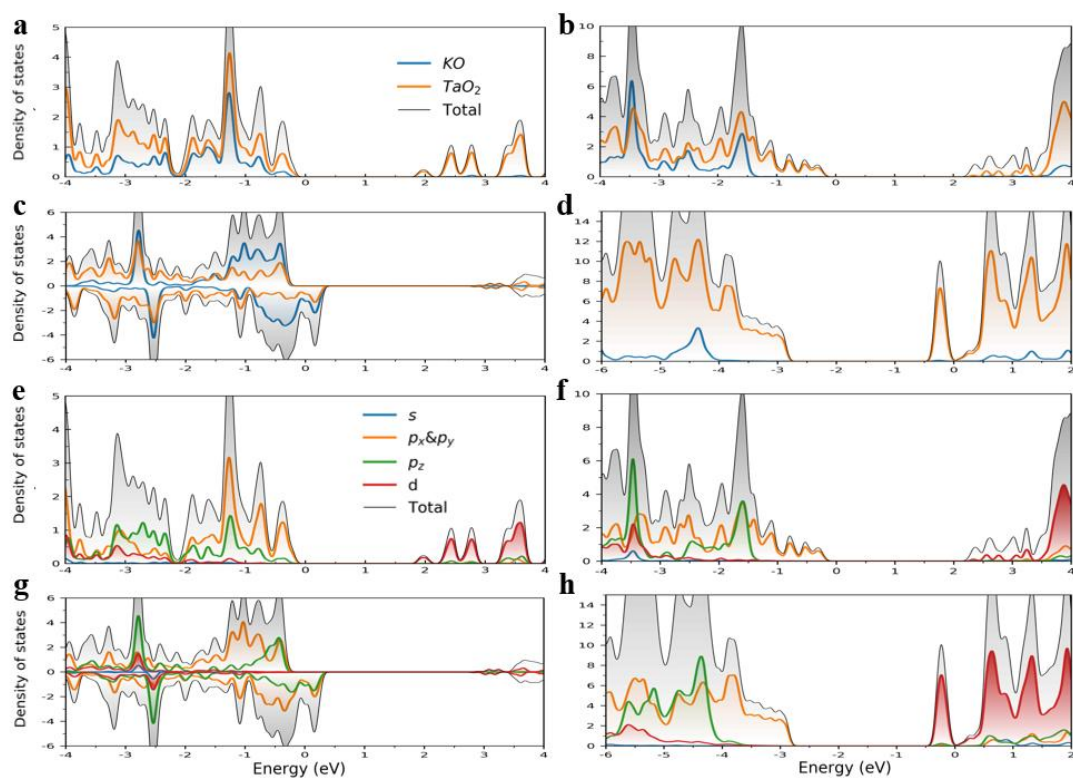

Figure S3. (a)-(d) are the layer resolved projected density of states (PDOS). (e)-(h) are the atomic orbital PDOS. (a) and (e) are for bulk KTO; (b) and (f) are for EL (2AL) system; (c) and (g) are for Type I (3AL); (d) and (h) are for Type II (3AL).

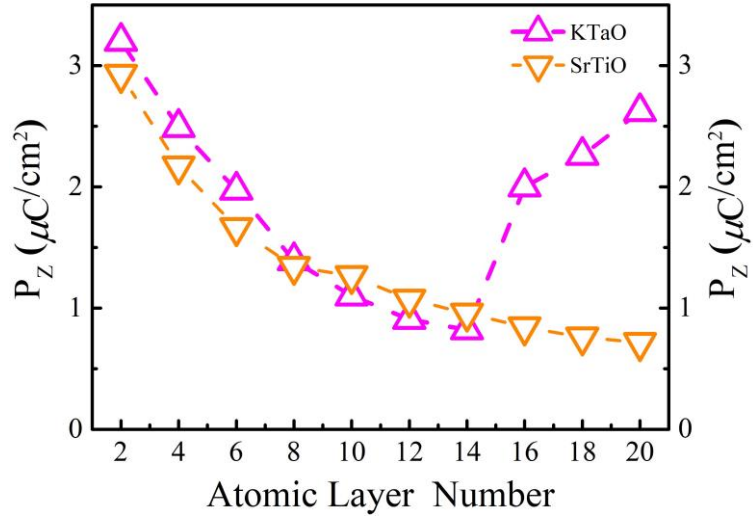

Figure S4. The out-of-plane polarization  $P_z$  ( $\mu\text{C}/\text{cm}^2$ ) of EL KTaO systems and EL SrTiO systems as functions of AL thickness. The  $P_z$  was calculated by integrating the charge density, which is dependent on the effective thickness of slab. Here, we applied an additional 2.5 Å space on each side of the slab to calculate the effective volume  $\Omega$ .

#### Reference

- [1] M. Maździarz, 2D Materials **6**, 048001 (2019).
- [2] G. Jellison Jr, I. Paulauskas, L. Boatner and D. Singh, Physical Review B **74**, 155130 (2006).
